# Supplementary material for: A wiping-type semiconductor–liquid generator utilizing water-bearing solid materials and hydrated biological tissues
Source: Royal Society of Chemistry journal article supplement (doi:10.1039/d4ee02797c), 2024-01-01
Supplement: d4ee02797c1.pdf [file d4ee02797c1.pdf]

Supplementary Information for

A wiping-type semiconductor-liquid generator utilizing water-bearing solid materials and hydrated biological tissues

Zhaoqi Liu<sup>a,b</sup>, Shiquan Lin<sup>c</sup>, Peng Yang<sup>a,b</sup>, Siyao Qin<sup>a,b</sup>, Jun Hu<sup>a,b</sup>, Xiangyu Chen<sup>a,b\*</sup>

<sup>a</sup>Beijing Institute of Nanoenergy and Nanosystems, Chinese Academy of Sciences, 100083 Beijing, China.

<sup>b</sup>School of Nanoscience and Engineering, University of Chinese Academy of Sciences, 100049 Beijing, China.

<sup>c</sup>School of Mechanical Engineering, Beijing Institute of Technology, Beijing 100081, China

\* X. C. (chenxiangyu@binn.cas.cn).

This file includes Table S1-S4, Figure S1-S8

Table S1: Selection of water bearing materials for friction.

| <b>Fabric type</b>                | <b>Number of cycles before damage</b> | <b>Number of cycles before drying</b> | <b>softness</b> |
|-----------------------------------|---------------------------------------|---------------------------------------|-----------------|
| absorbent cloth (eyeglass cloths) | Over 100                              | Over 100                              | √               |
| toilet tissue                     | 5-10                                  | Not dried before damage               | √               |
| regular silk                      | Over 100                              | 40-50                                 | √               |
| printing paper                    | 20-30                                 | Not dried before damage               | ×               |
| foam plastic                      | Over 100                              | 70-80                                 | ×               |

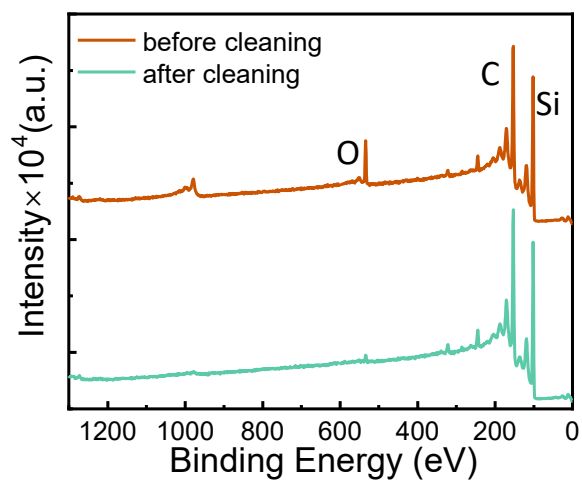

Fig. S1 XPS spectra of Si before and after cleaning with HF.

Table S2: The electrical resistivity of the liquid used as a connecting.

| Liquid                           | Conductivity (S·m <sup>-1</sup> ) |
|----------------------------------|-----------------------------------|
| C <sub>2</sub> H <sub>5</sub> OH | 10 <sup>-7</sup>                  |
| DI water                         | 5.5×10 <sup>-6</sup>              |
| NaCl (1M, aq)                    | 126.4                             |
| Na <sub>2</sub> Cl (1M, aq)      | 156.1                             |

Table S3: Surface charge density of Solid-solid TENG & TVNG in previous studies.

| Mode                      | Charge density (mC·m <sup>-2</sup> ) | Reference |
|---------------------------|--------------------------------------|-----------|
| Solid-solid TENG          | 0.13                                 | [40]      |
| Solid-solid TENG          | 0.43                                 | [46]      |
| Solid-solid TENG          | 1.2                                  | [42]      |
| TENG in humid environment | 2.38                                 | [36]      |
| Solid-solid TENG          | 3.53                                 | [37]      |
| Solid-solid TENG          | Over 4                               | [44]      |
| Solid-solid TENG          | 8.8                                  | [45]      |
| Solid-solid TVNG          | 23                                   | [41]      |
| Solid-solid TVNG          | 31                                   | [47]      |
| Solid-solid TVNG          | 79.31                                | [43]      |
| Solid-solid TVNG          | 98                                   | [39]      |
| Solid-solid TVNG          | 136.3                                | [38]      |

Table S4: Surface charge density of Solid-liquid generator in previous studies.

| Mode              | Charge density (mC·m <sup>-2</sup> ) | Reference |
|-------------------|--------------------------------------|-----------|
| Solid-liquid TENG | 0.103                                | [17]      |
| DEG               | 0.185                                | [19]      |
| Solid-solid TENG  | 0.391                                | [15]      |
| Solid-liquid TENG | 0.4                                  | [16]      |
| Solid-liquid TENG | 0.5                                  | [20]      |
| Solid-liquid TENG | 1.8                                  | [48]      |
| Solid-liquid TENG | 1.92                                 | [18]      |

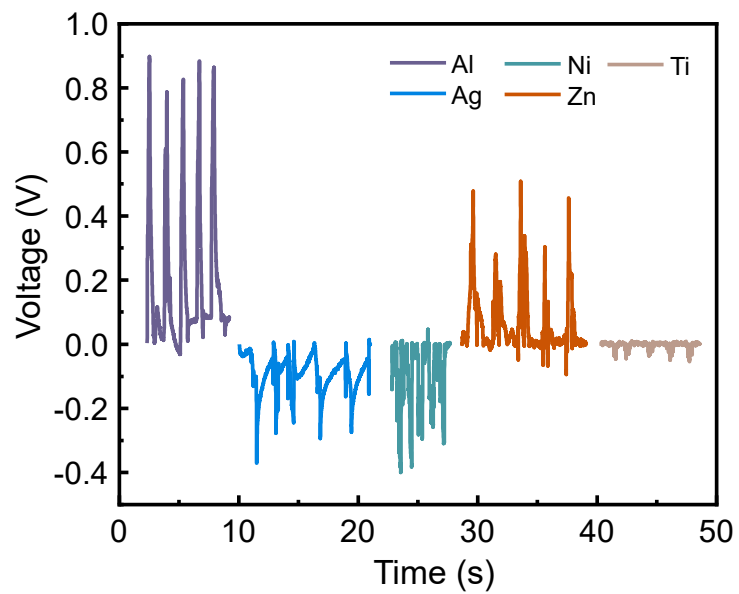

Fig. S2: The detailed data of voltage of wiping generator using different upper metal electrode.

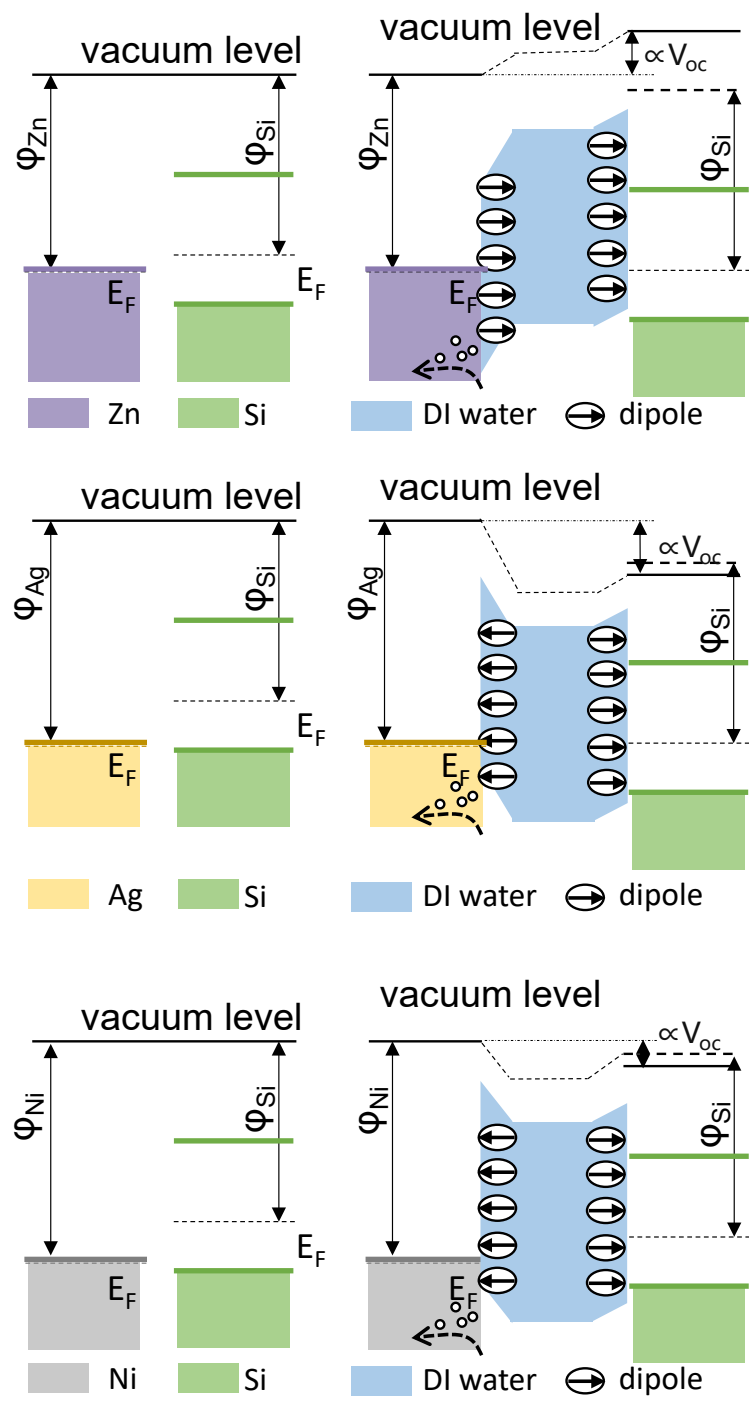

Fig. S3 Band diagram variations of Zn-Si, Ag-Si and Ni-Si Schottky under water excitation.



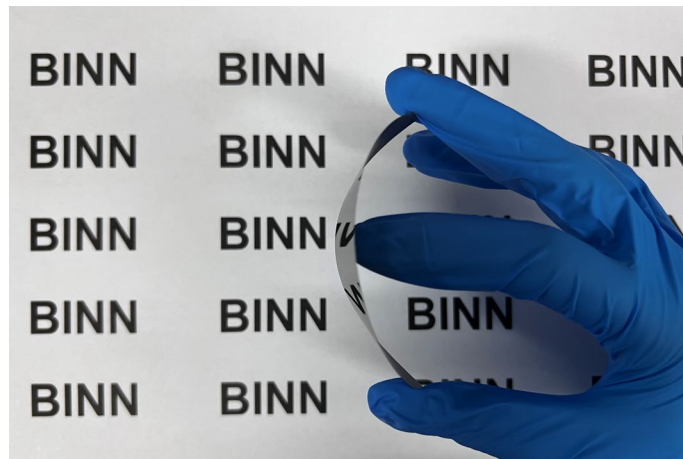

Fig. S4 Flexibility display of 100 μm Si wafer.

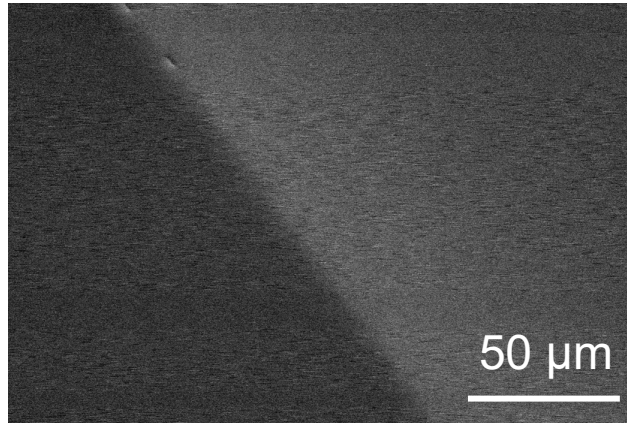

Fig. S5 SEM image of silicon wafer edge embedded in PDMS.

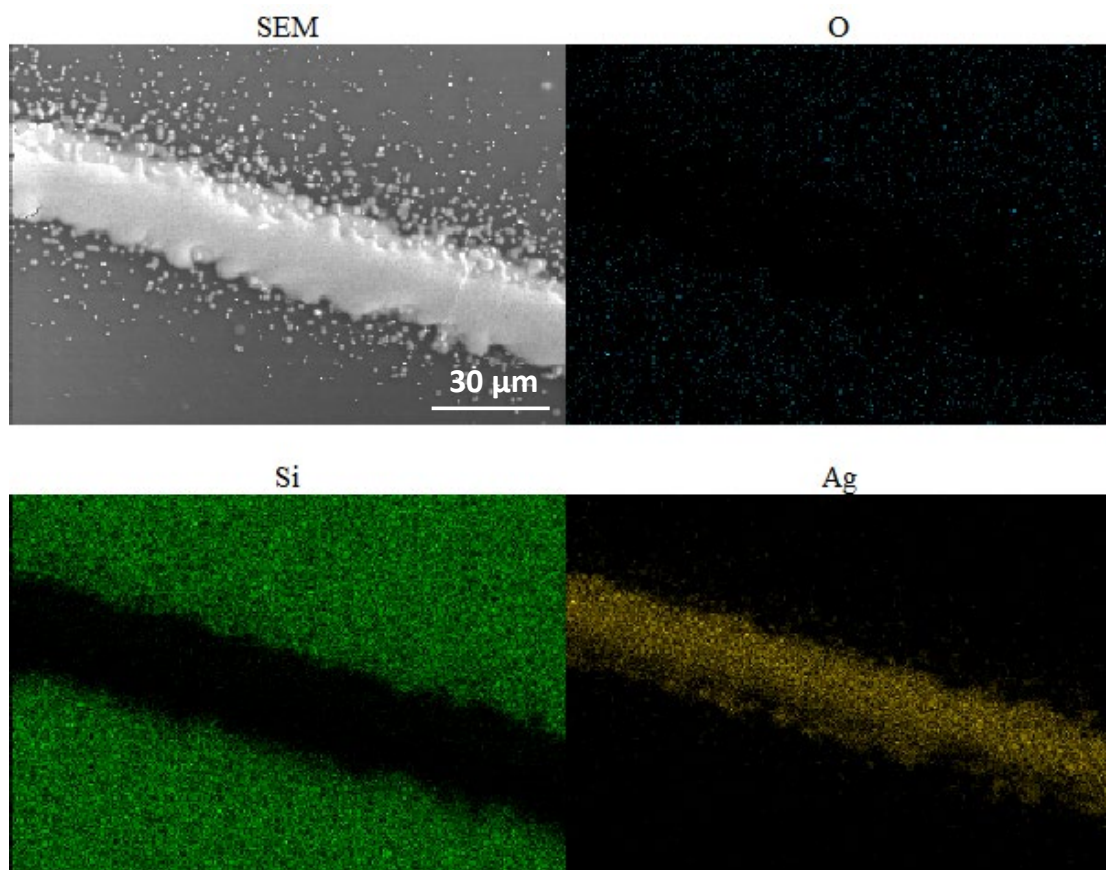

Fig. S6 Energy Dispersive Spectrometer spectra of the PDMS substrate and Ag wire on smart contact lenses.

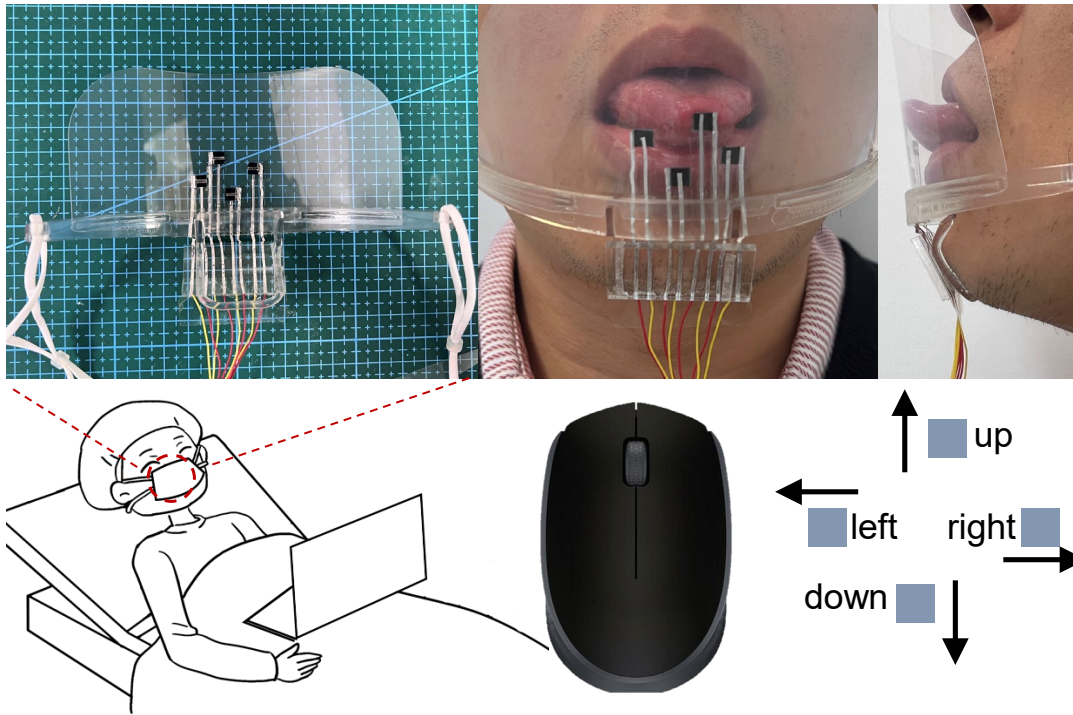

Fig. S7 The demonstration of sensor based on wiping generator, used for expression indication in paralyzed patients. The mask with four independent patch sensors on the inner surface, enabling paralyzed individuals to communicate basic directions using tongue movements.

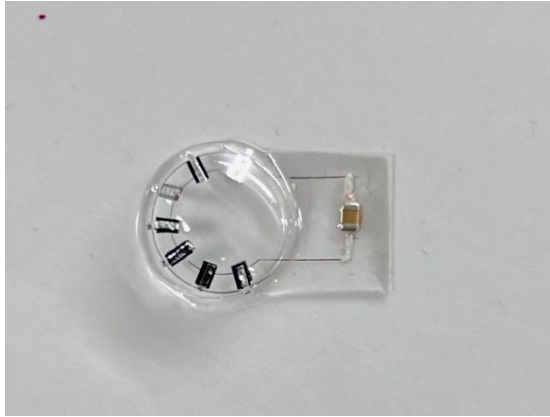

Fig. S8: The smart contact lens with capacitors to store electrical energy.
